# Supplementary material for: Connecting the oxidation of soot to its redox cycling abilities
Source: PubMed Central journal article supplement (PMC4410628; doi:10.1038/ncomms7812), 2015-04-15
Supplement: ncomms7812-s1.pdf [file ncomms7812-s1.pdf]

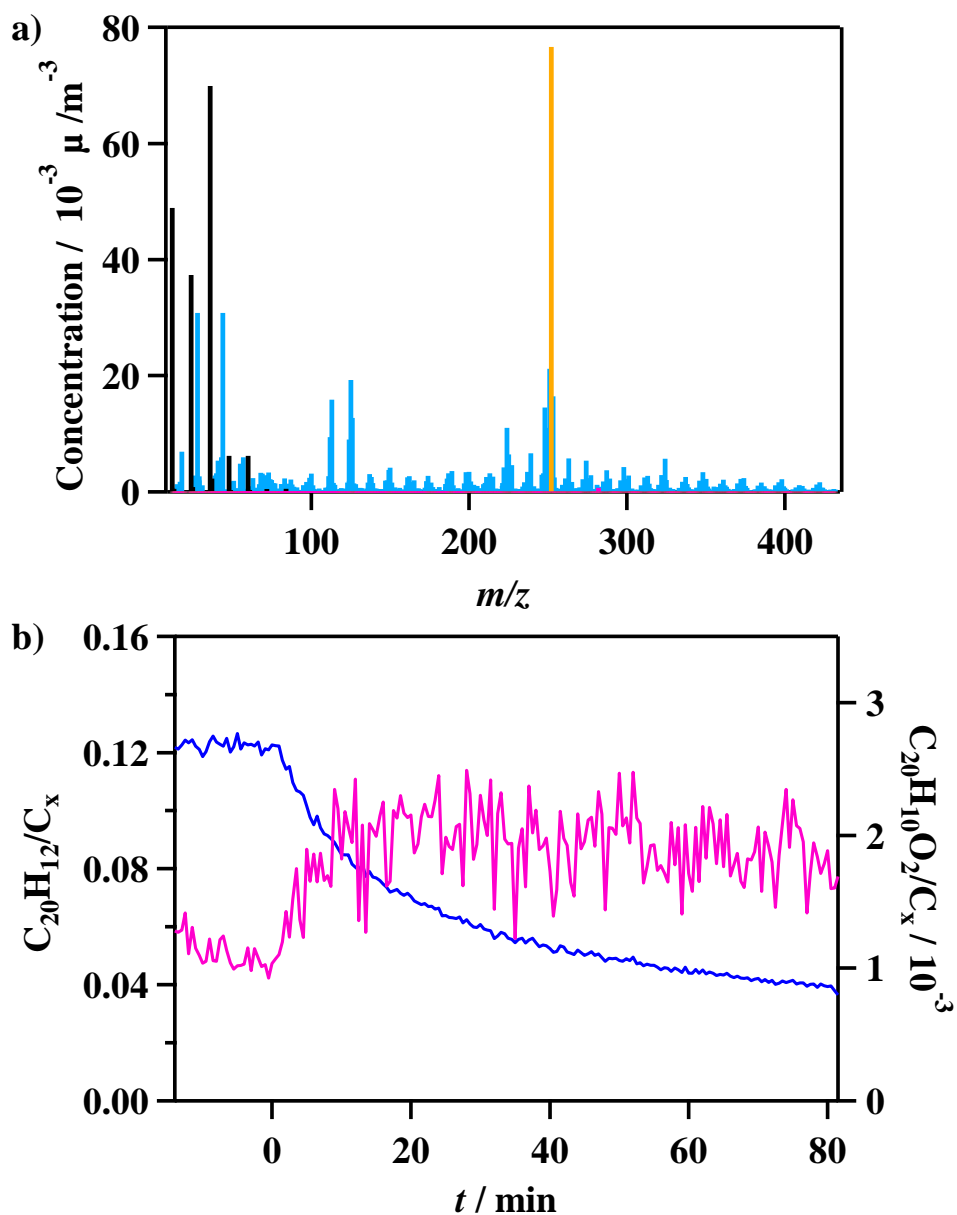

**Supplementary Figure 1. Polycyclic aromatic hydrocarbons (PAHs) on benzo[e]pyrene (BeP) coated soot particles.** a) Example of SP-AMS (Soot-Particle Aerosol Mass Spectrometer) spectrum of soot particles coated with BeP. Organic species are depicted in blue, whereas carbon species are in black. The orange line at  $m/z = 252$  corresponds to the BeP molecular ion ( $C_{20}H_{12}^+$ ). b) Time evolution of the signals normalized to carbon of BeP (blue) and its corresponding quinone (pink).  $t = 0$  min indicates the time at which  $O_3$  was added to the chamber in that experiment.

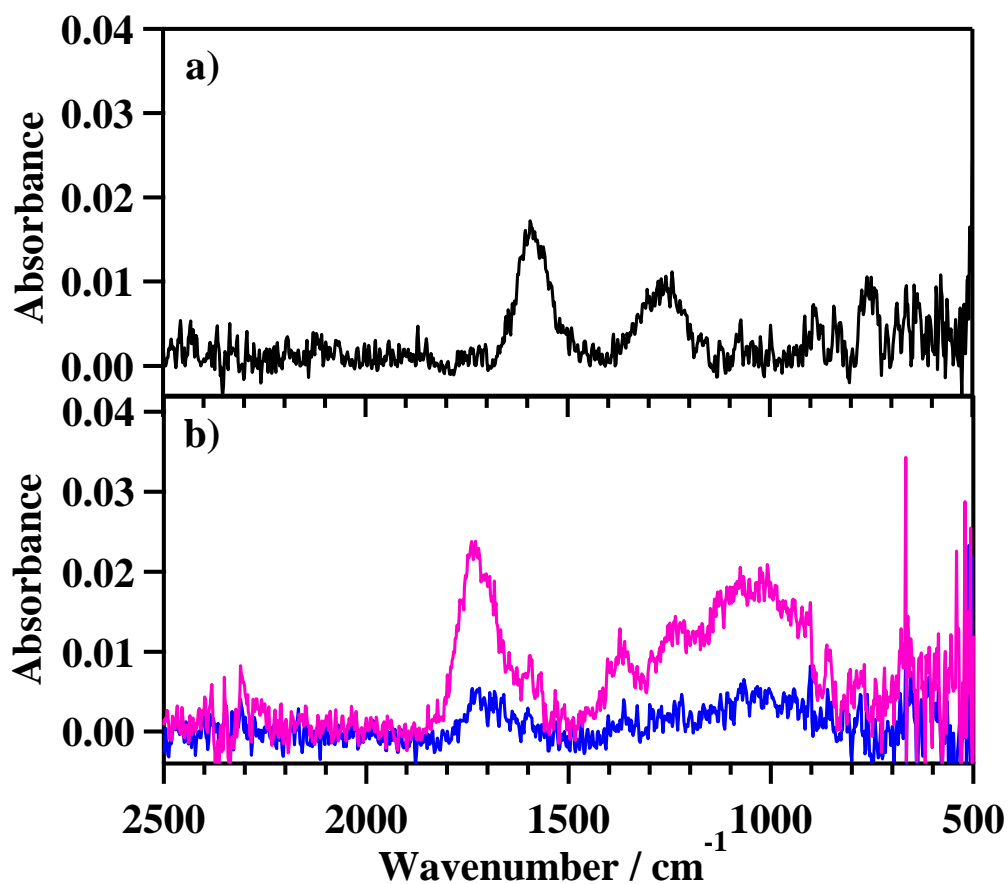

**Supplementary Figure 2. DRIFT (Diffuse Reflectance Infrared Fourier Transform) spectra for bare soot.** (a) Spectrum before  $O_3$  exposure to 20 ppm (parts per million)  $O_3$  and when the reference spectrum was KBr. (b) Spectra after exposure to 20 ppm, when the reference spectrum as unoxidized soot and KBr (see text). Time of exposure to  $O_3$ : 0 min (black), 15 min (blue), and 360 min (pink).

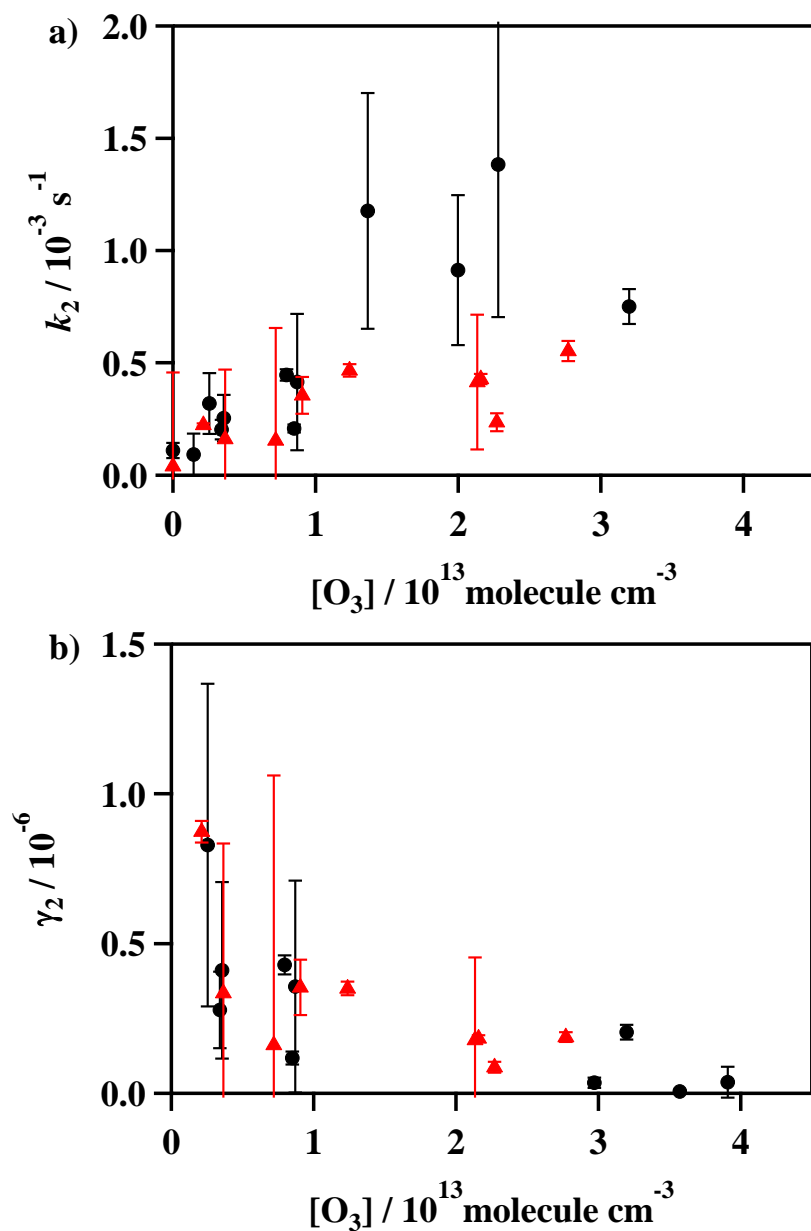

**Supplementary Figure 3. Kinetic results for uncoated and benzo[e]pyrene (BeP) coated soot.** a) Pseudo-first order rate constants for the slow loss process observed in the decays as a function of  $O_3$  concentration for the reactions with total PAHs (Polycyclic Aromatic Hydrocarbons) in soot (black) and BeP in soot (red). b) Uptake coefficients calculated from  $k_2'$  using equation 2. Every point corresponds to one experiment. Error bars represent standard deviation.

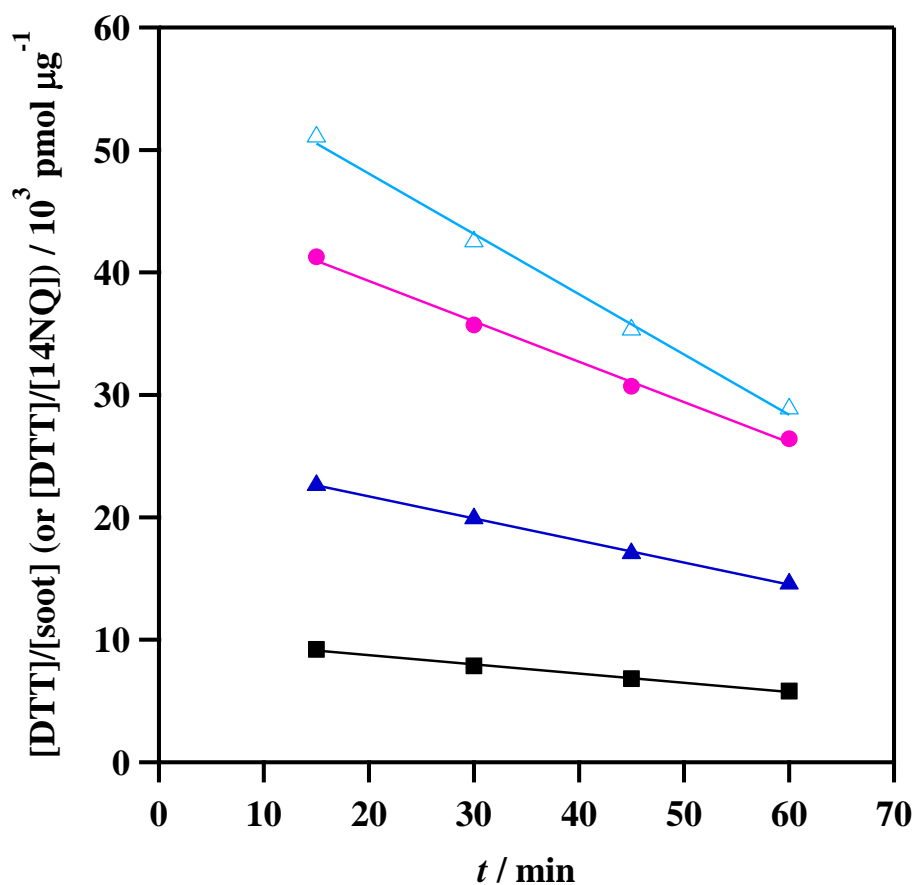

**Supplementary Figure 4. Decay of dithiothreitol (DTT) concentration.** Sample decays of DTT concentration as a function of time for 1,4-naphthoquinone (14NQ, light blue triangles) and soot at three different O<sub>3</sub> exposure times (no exposure, in black squares;  $6 \times 10^9$  molecule cm<sup>-3</sup> h in blue triangles; and  $4 \times 10^{13}$  molecule cm<sup>-3</sup> h in pink circles). [DTT] (i.e. moles per volume) was normalized with the concentration of soot or quinone (i.e. mass per volume) that was used to measure the decay rate. Lines represent the linear fitting of the points.

**Supplementary Table 1. Experimental conditions.** Average experimental conditions inside the smog chamber at the start of the experiments for the DTT (dithiothreitol) assay. Experiments for SP-AMS (Soot-Particle Aerosol Mass Spectrometer) analysis were performed with lower soot mass loadings.

| Measurement                                                  | Value                                |
|--------------------------------------------------------------|--------------------------------------|
| <b>Mean diameter of particles of the number distribution</b> | 327 nm                               |
| <b>Effective density</b>                                     | 0.2 g cm <sup>-3</sup>               |
| <b>Particle concentration</b>                                | 1.5×10 <sup>5</sup> cm <sup>-3</sup> |
| <b>Mass loading</b>                                          | 6.7 mg m <sup>-3</sup>               |
| [O <sub>3</sub> ]                                            | 70-4000 ppb *                        |
| [NO]                                                         | 9 ppb *                              |
| [NO <sub>x</sub> ]                                           | 22 ppb *                             |
| [SO <sub>2</sub> ]                                           | 1 ppb *                              |
| [CO <sub>2</sub> ]                                           | 206 ppm **                           |
| [CO]                                                         | 1120 ppb *                           |

\* ppb: parts per billion, \*\* ppm: parts per million

**Supplementary Table 2. PAHs (polycyclic aromatic hydrocarbons) list.** PAHs that were considered in the analysis of the SP-AMS (Soot-Particle Aerosol Mass Spectrometer) data.

| Molecular Formula               | MW / g mol <sup>-1</sup> | Structure                                                                           | Name                            |
|---------------------------------|--------------------------|-------------------------------------------------------------------------------------|---------------------------------|
| C <sub>12</sub> H <sub>8</sub>  | 152                      |    | Acenaphthylene                  |
| C <sub>12</sub> H <sub>10</sub> | 154                      |    | Acenaphthene                    |
| C <sub>13</sub> H <sub>10</sub> | 166                      |    | Fluorene                        |
| C <sub>14</sub> H <sub>10</sub> | 178                      |    | Phenanthrene                    |
| C <sub>14</sub> H <sub>10</sub> | 178                      |  | Anthracene                      |
| C <sub>16</sub> H <sub>10</sub> | 202                      |  | Pyrene                          |
| C <sub>16</sub> H <sub>10</sub> | 202                      |  | Fluoranthene                    |
| C <sub>16</sub> H <sub>10</sub> | 202                      |  | Acephenanthrylene               |
| C <sub>17</sub> H <sub>12</sub> | 216                      |  | 1,2-Benzofluorene               |
| C <sub>17</sub> H <sub>12</sub> | 216                      |  | 2,3-Benzofluorene               |
| C <sub>17</sub> H <sub>12</sub> | 216                      |  | 1-Methylpyrene                  |
| C <sub>18</sub> H <sub>10</sub> | 226                      |  | Benzo[ <i>ghi</i> ]fluoranthene |

| Molecular Formula               | MW / g mol <sup>-1</sup> | Structure                                                                           | Name                                  |
|---------------------------------|--------------------------|-------------------------------------------------------------------------------------|---------------------------------------|
| C <sub>18</sub> H <sub>10</sub> | 226                      | 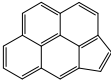   | Cyclopenta[ <i>cd</i> ]pyrene         |
| C <sub>18</sub> H <sub>12</sub> | 228                      |    | Benz[ <i>a</i> ]anthracene            |
| C <sub>18</sub> H <sub>12</sub> | 228                      |    | Chrysene                              |
| C <sub>18</sub> H <sub>12</sub> | 228                      |    | Triphenylene                          |
| C <sub>19</sub> H <sub>12</sub> | 240                      |    | Methylbenzo[ <i>ghi</i> ]fluoranthene |
| C <sub>19</sub> H <sub>14</sub> | 242                      |   | 10-Methylbenz[ <i>a</i> ]anthracene   |
| C <sub>20</sub> H <sub>10</sub> | 250                      |  | Corannulene                           |
| C <sub>20</sub> H <sub>10</sub> | 250                      |  | Dicyclopental[ <i>cd,mn</i> ]pyrene   |
| C <sub>20</sub> H <sub>12</sub> | 252                      |  | Benzo[ <i>b</i> ]fluoranthene         |
| C <sub>20</sub> H <sub>12</sub> | 252                      |  | Benzo[ <i>j</i> ]fluoranthene         |
| C <sub>20</sub> H <sub>12</sub> | 252                      |  | Benzo[ <i>k</i> ]fluoranthene         |
| C <sub>20</sub> H <sub>12</sub> | 252                      |  | Benzo[ <i>a</i> ]pyrene               |
| C <sub>20</sub> H <sub>12</sub> | 252                      |  | Benzo[ <i>e</i> ]pyrene               |

| Molecular Formula               | MW / g mol <sup>-1</sup> | Structure | Name                                                            |
|---------------------------------|--------------------------|-----------|-----------------------------------------------------------------|
| C <sub>21</sub> H <sub>12</sub> | 264                      |           | 11 <i>H</i> -Cyclopenta[ <i>ghi</i> ]perylene                   |
| C <sub>21</sub> H <sub>14</sub> | 266                      |           | 4 <i>H</i> -Benzo[ <i>hi</i> ]chrysene                          |
| C <sub>22</sub> H <sub>12</sub> | 276                      |           | Indeno[1,2,3- <i>cd</i> ]pyrene                                 |
| C <sub>22</sub> H <sub>12</sub> | 276                      |           | Benzo[ <i>ghi</i> ]perylene                                     |
| C <sub>23</sub> H <sub>12</sub> | 288                      |           | 1 <i>H</i> -Benzo[ <i>ghi</i> ]cyclopenta[ <i>pqr</i> ]perylene |
| C <sub>23</sub> H <sub>14</sub> | 290                      |           | 9 <i>H</i> -Indeno[1,2- <i>e</i> ]pyrene                        |
| C <sub>24</sub> H <sub>12</sub> | 300                      |           | Coronene                                                        |
| C <sub>24</sub> H <sub>14</sub> | 302                      |           | Benzo[ <i>a</i> ]perylene                                       |
| C <sub>24</sub> H <sub>14</sub> | 302                      |           | Indeno[1,7- <i>ab</i> ]triphenylene                             |
| C <sub>25</sub> H <sub>16</sub> | 316                      |           | 15 <i>H</i> -Benz[4,5]indeno[1,2- <i>l</i> ]phenanthrene        |
| C <sub>26</sub> H <sub>14</sub> | 326                      |           | Dibenzo[ <i>a,ghi</i> ]perylene                                 |
| C <sub>26</sub> H <sub>14</sub> | 328                      |           | Phenanthro[3,4- <i>c</i> ]phenanthrene                          |



**Supplementary Table 3. O<sub>3</sub> exposures.** Time and average O<sub>3</sub> concentration used in the oxidation of bare soot particles at each reported O<sub>3</sub> exposure.

| $[\text{O}_3]t / 10^{12}$<br>molecule $\text{cm}^{-3}$ h | $[\text{O}_3] / 10^{12}$<br>molecule $\text{cm}^{-3}$ | $t / \text{min}$ |
|----------------------------------------------------------|-------------------------------------------------------|------------------|
| 0.00                                                     | 0.000                                                 | 0                |
| 0.0042                                                   | 0.010                                                 | 25               |
| 0.0061                                                   | 0.025                                                 | 15               |
| 0.037                                                    | 0.074                                                 | 30               |
| 0.85                                                     | 3.4                                                   | 15               |
| 2.2                                                      | 4.5                                                   | 30               |
| 4.4                                                      | 8.8                                                   | 30               |
| 5.0                                                      | 10                                                    | 30               |
| 11                                                       | 13                                                    | 50               |
| 17                                                       | 14                                                    | 70               |
| 20                                                       | 20                                                    | 60               |
| 26                                                       | 52                                                    | 30               |
| 35                                                       | 69                                                    | 30               |
| 42                                                       | 56                                                    | 45               |
| 67                                                       | 67                                                    | 60               |
| 73                                                       | 73                                                    | 60               |
| 77                                                       | 77                                                    | 60               |
